# Supplementary material
Source: publisher figshare collection journal article supplement (https://acs.figshare.com/ndownloader/files/24851037)
Supplement: Supplementary file 1 [file 24851037]

## The Lithium Ion Hybrid Capacitor with a Scaffold Electrode of Tin Sulfide and Tin Metal and its Electrolyte Issue

Yu-Shun Luo, Dah-Shyang Tsai\*, Chien-Chen Wang, Chun-Wei Chiang

Department of Chemical Engineering, National Taiwan University of Science and Technology, 43, Keelung Road, Section 4, Taipei, 10607 Taiwan

\*Corresponding author, ORCID <https://orcid.org/0000-0001-8067-9540>

E-mail address: [dstsai@mail.ntust.edu.tw](mailto:dstsai@mail.ntust.edu.tw)

FAX: 886-2-27376644

Phone: 886-2-27376618

The diffraction patterns of 5SnS- 5Sn/CNT and 8SnS-2Sn/CNT powders are plotted in Fig. S1. Both samples show the diffraction lines of  $\alpha$  tin sulfide (JCPDS 75-1803) and  $\beta$ -tin (JCPDS 86-2265). The composition has been estimated with its EDX analysis result, confirmed by chemical analysis.

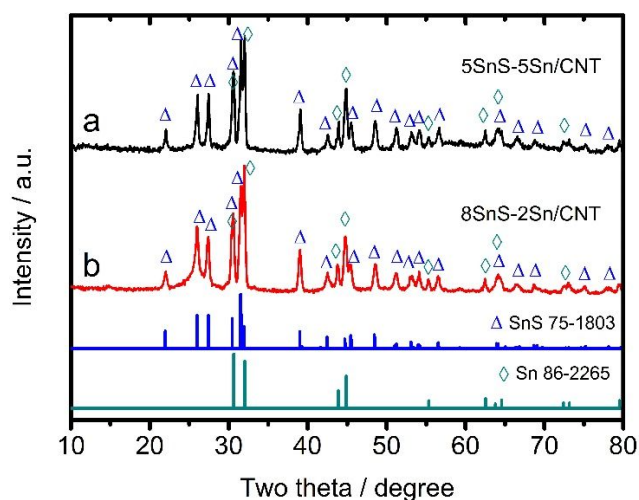

Fig. S1 XRD results of SnS-Sn/CNT. The diffraction patterns of (a) 5SnS-5Sn/CNT and (b) 8SnS-2Sn/CNT. The CNT scaffold has been acidified at 50 °C before soaking in the molten slag of tin and sulfur.

In comparison with 5SnS-5Sn/CNT, the morphology of 8SnS-2Sn/CNT displays less porosity, Fig. S2b. The coatings of 8SnS-2Sn/CNT are thicker as well, before and after lithiation. We also note that the coating is strongly bonded to CNT, either 8SnS-2Sn/CNT or 5SnS-5Sn/CNT, therefore, the repeated cycles of lithiation and delithiation do not cause the SnS-Sn coatings to peel off.

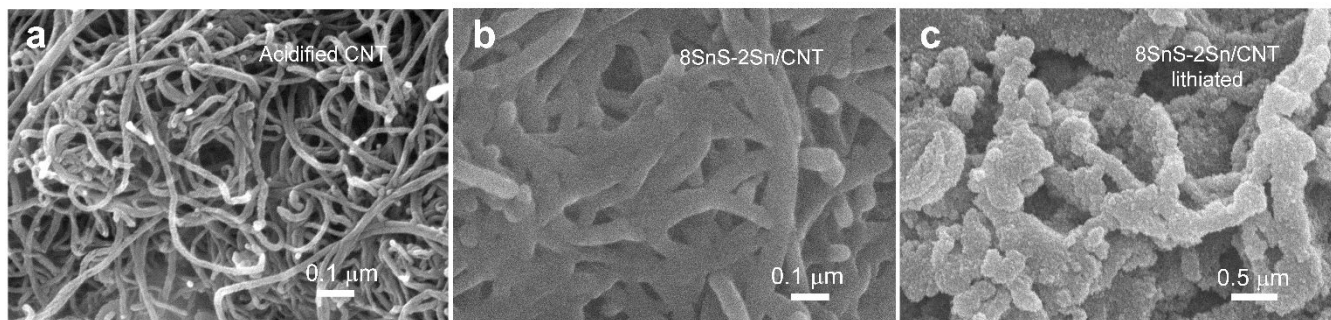

Fig. S2 Morphology of 8SnS-2Sn/CNT. SEM images of (a) multi-walled CNT, (b) 8SnS-2Sn/CNT before lithiation, (c) 8SnS-2Sn/CNT after lithiation. Please note the scale bar of Fig. S2(c) is 0.5  $\mu\text{m}$ , instead of 0.1  $\mu\text{m}$ .

Two CV curves of 8SnS-2Sn/CNT are plotted in Fig. S3. The voltammogram of Fig. S3a is measured in the electrolyte of 1.0 M LiTFSI and 0.2 M LiNO<sub>3</sub>, and that of Fig. S3b is measured in the electrolyte of 1.0 M LiPF<sub>6</sub>. They are very similar to those shown in Fig. 3, CV of LiPF<sub>6</sub> is slightly thicker in enclosed area, compared with that of LiTFSI.

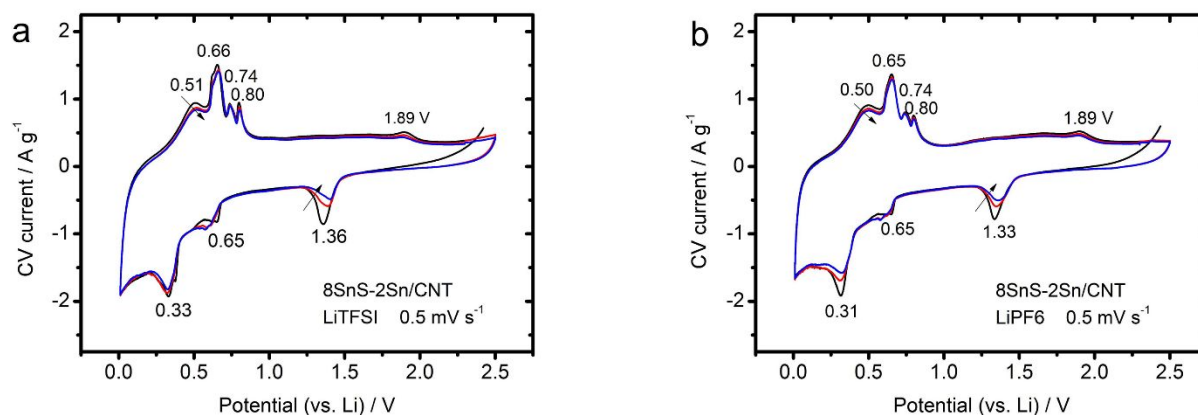

Fig. S3 CV results of 8SnS-2Sn/CNT. Voltammograms are scanned at 0.5  $\text{mV s}^{-1}$ , in the electrolyte of (a) 1.0 M LiTFSI and 0.2 M LiNO<sub>3</sub> or (b) 1.0 M LiPF<sub>6</sub>.

Comparison of the CV curves reveals the influences of electrode sulfur and the plausible existence of polysulfides. Fig. S4a contrasts the CV currents in the LiTFSI electrolyte and the LiPF<sub>6</sub> electrolyte, showing that the CV current of LiPF<sub>6</sub> is higher than that of LiTFSI between 1.25 and 2.5 V. Fig. S4b points out the CV current of 8SnS-2Sn/CNT is higher than that of 5SnS-5Sn/CNT. We attribute the higher CV currents to a small amount of polysulfides in the electrolyte.<sup>54</sup>

Most probably, the electrolyte polysulfides were produced in the prelithiation step of SnS-Sn/CNT electrode. Since the sulfur content of 8SnS-2Sn/CNT is higher than 5SnS-5Sn/CNT, the amount of polysulfides is higher in the case of 8SnS-2Sn/CNT. On the other hand, LiNO<sub>3</sub> can oxidize the polysulfides and diminish their concentrations,<sup>47</sup> thus, the influences of polysulfides are less in the LiTFSI electrolyte, since the LiTFSI electrolyte also contains 0.2 M LiNO<sub>3</sub>, while the LiPF<sub>6</sub> electrolyte does not.

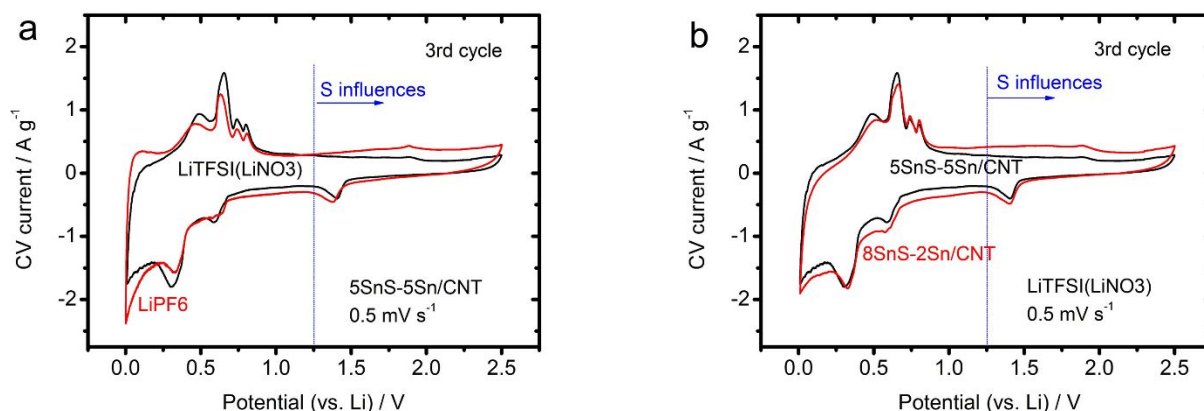

Fig. S4 Influences of electrode sulfur on CV between 1.25 and 2.5 V. Sulfur influences are visible when the CV currents are contrasted between (a) the LiTFSI electrolyte and the LiPF<sub>6</sub> electrolyte for the 5SnS-5Sn/CNT electrode, (b) the 8SnS-2Sn/CNT electrode and the 5SnS-5Sn/CNT electrode in the LiTFSI electrolyte. Either a higher sulfur content of electrode or an electrolyte without LiNO<sub>3</sub> produces a higher CV current. The dashed lines show the region that sulfur influences are significant.

(54) Chen, S.; Dai, F.; Gordin M. L.; Wang, D. Exceptional Electrochemical Performance of Rechargeable Li-S Batteries with a Polysulfide Containing Electrolyte. *RSC Adv.* **2013**, 3, 3540-3543.

The impedance results of two full cells of 4:1 mass ratio, soaked in LiTFSI and LiPF<sub>6</sub>, are contrasted in Fig. S5. The negative 5SnS-5Sn/CNT electrodes have been prelithiated between 2.5 and 0.01 V for three cycles with a three-electrode setup and ended at 0.1 V to store sufficient lithium in the negative electrode. The lithium counter electrode is then removed, and the positive KPN900 electrode is placed on top of the negative electrode covered with the separator. After a few cycles of charge and discharge,

the impedance of the 4:1 cell is measured with a frequency analyzer. The impedance results of the full cell with the LiTFSI electrolyte are less than those of the LiPF<sub>6</sub> cell, Fig. S5b. The magnitude difference between LiTFSI and LiPF<sub>6</sub> cells is less at high frequency, and increases with decreasing frequency. The two impedance results are fitted with an equivalent circuit, which includes an electrolyte resistance  $R_S$ , in series with a pair of resistance and Warburg element  $R_1/W_1$ , a pair of resistance and constant phase element,  $R_2/CPE_2$ , and a constant phase element  $CPE_1$ . The total resistance,  $R_S+R_1+R_2$ , is 19.3  $\Omega$  for the LiTFSI cell, and 35.0  $\Omega$  for the LiPF<sub>6</sub> cell.

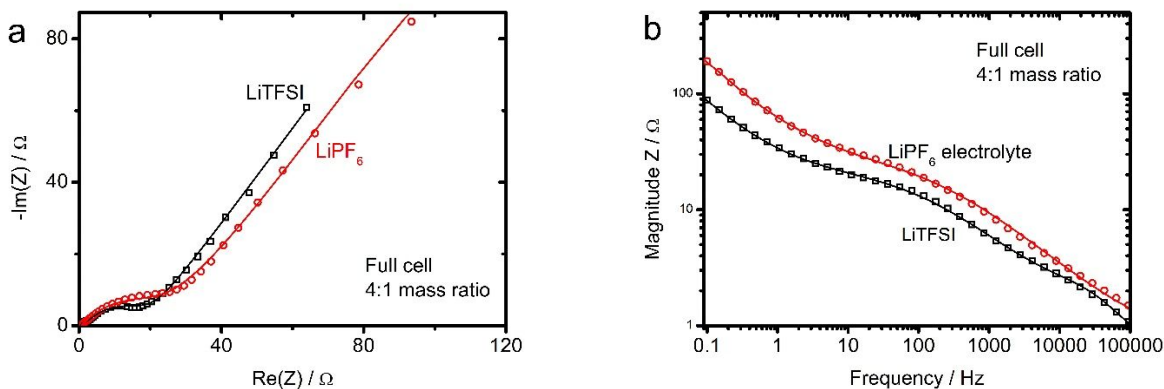

Fig. S5 Impedance comparison between the full cells of LiTFSI and LiPF<sub>6</sub>. The two cells have similar loadings of active materials, one is soaked in LiTFSI electrolyte, and the other is in LiPF<sub>6</sub> electrolyte. The two Nyquist plots are shown in Fig. S5(a); while the two Bode plots are illustrated in Fig. S5(b).

Voltage partition is influenced by multiple factors, such as electrode capacities, prelithiation, mass ratio, and charging current. For the 4:1 full cell of KPN900//SnS-Sn/CNT in LiTFSI,  $\Delta U_+$  and  $\Delta U_-$  values vary with charging current systematically, as shown in Fig. S6.

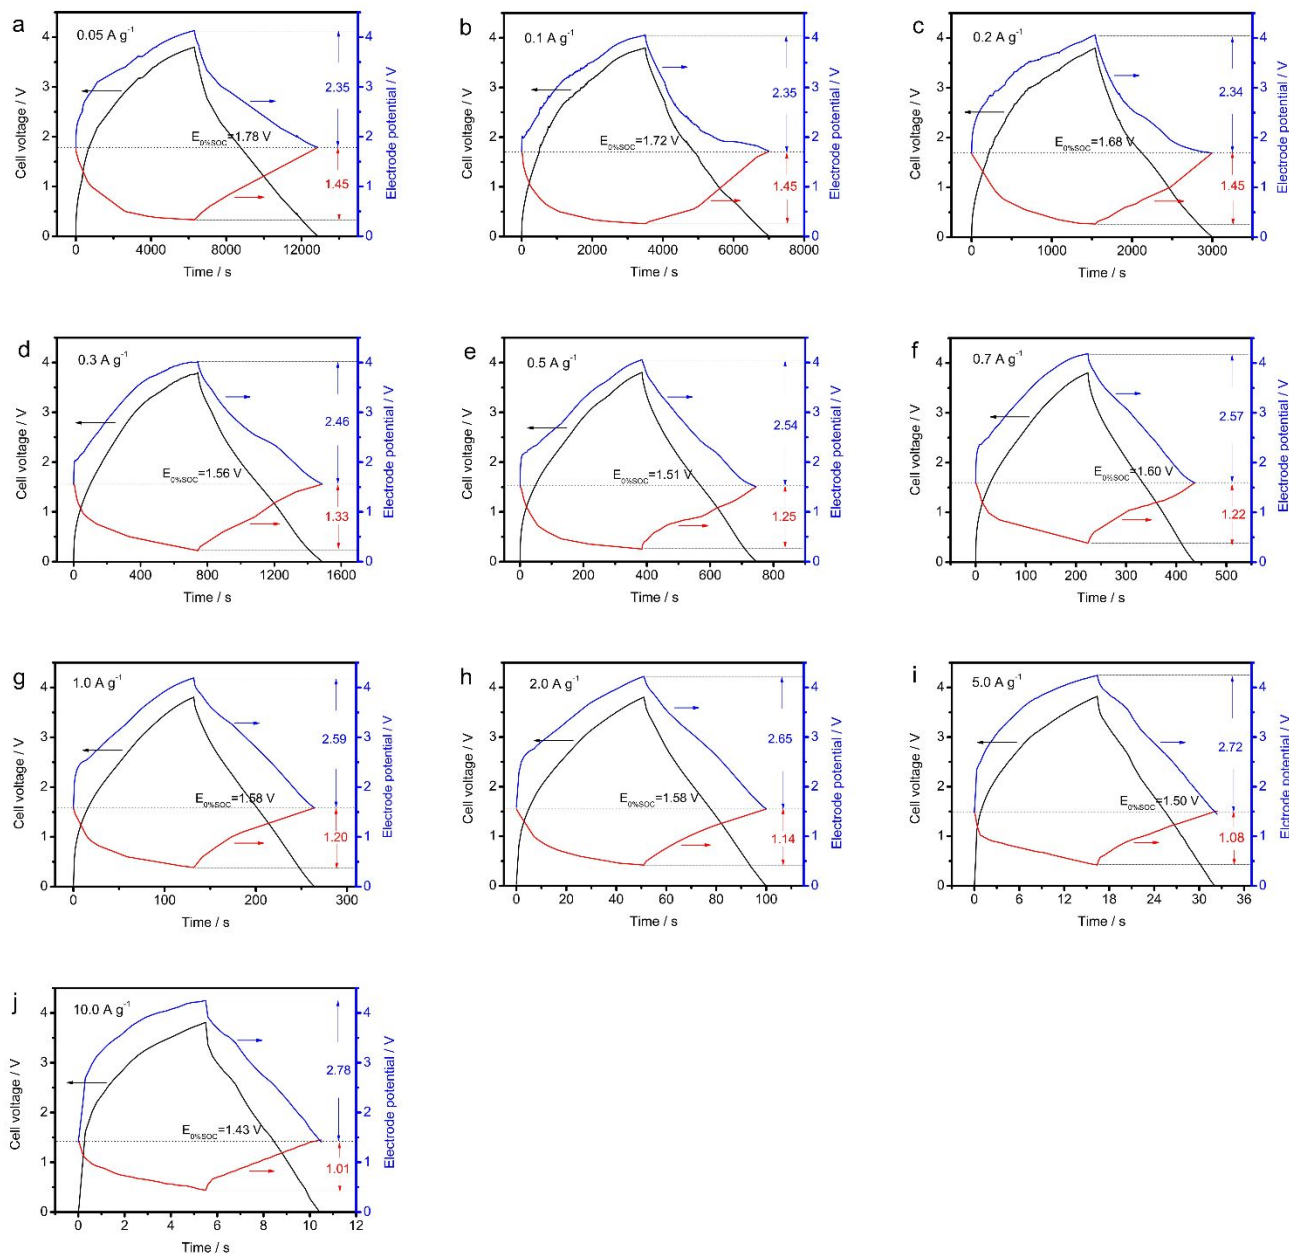

Fig. S6 Voltage profiles and electrode potential profiles of the 4:1 full cell of KPN900//SnS-Sn/CNT with a negative 5SnS-5Sn/CNT. The electrolyte is 1.0 M LiTFSI and 0.2 M LiNO<sub>3</sub> in an ether-based solution. The cell voltage profiles, positive and negative potentials, during charge discharge in 3.8 V voltage window, are plotted for (a) 0.05, (b) 0.1 (c) 0.2, (d) 0.3, (e) 0.5, (f) 0.7, (g) 1.0, (h) 2.0, (i) 5.0, (j) 10.0  $A g^{-1}$ .
